# Supplementary material for: Summary and synthesis of Changing Cold Regions Network (CCRN) research in the interior of western Canada – Part 2: Future change in cryosphere, vegetation, and hydrology
Source: Copernicus journal article supplement (doi:10.5194/hess-2020-491), 2020-10-17
Supplement: Supplementary file [file hess-2020-491-AC1-supplement.pdf]

## Author's Response

We thank the two reviewers for their time and effort and for the helpful comments on the manuscript. The positive feedback is very much appreciated. We will make a concerted effort to address these points and revise the manuscript. Below we respond to the individual comments in detail (in red font).

### Reviewer #1

#### Specific comments

Page 9, Line 46: Just an advice: Here only the results under RCP 8.5 are described, other results may need to be presented such as under RCP 4.5, or 1.5 or 2.0 degree temperature rise scenarios that would happen more possibly.

Clarke et al. (2015) do indeed present glacier change results for other RCPs and we will make sure to include a summary of their projections under even the more modest future climate warming scenarios.

Page 13, Line 4-5: As a result of warming and shallower re-freeze depths during winter, active layer thickness has been decreasing. Please check.

Thank you for raising this point. This involves 1) permafrost terminology, and 2) active layer processes. Active layer is the zone that thaws AND freezes each year. Warming leads to increased thickness of the suprapermafrost layer (suprapermafrost layer includes all layers above the permafrost table: i.e. the active layer (seasonally frozen) and the talik (perennially thawed).

Technical corrections Page 8, Line 30, "a nd" should be "and"

We will correct this.

### Reviewer #2

#### GENERAL COMMENTS

1. According to HESS guidelines, a review paper should "summarize the status of knowledge and outline future directions of research within the journal scope" ([https://www.hydrology-and-earth-system-sciences.net/about/manuscript\\_types.html](https://www.hydrology-and-earth-system-sciences.net/about/manuscript_types.html)). The paper is excellent in the way it summarizes the status of knowledge, but I think it would be even a more substantial contribution to the current literature if it included a specific section on future directions of research. What is left to understand after the substantial – and unifying – contribution provided by CCRN? Are there significant knowledge gaps that authors would recommend for future initiatives? Some of these knowledge gaps are already mentioned throughout the manuscript, but being more explicit on this in a dedicated section would sharpen the message of the paper and further enhance its impact.

This is a useful suggestion and we will follow the advice in our revision. We will include an explicit discussion on the knowledge gaps and priority issues for future research.

2. I was intrigued by the following statement in the abstract and somewhere else in the main text: "It is essential to consider the underlying processes and base predictive models on the proper physics, especially under conditions of non-stationarity where the past is no longer a reliable guide to the future and system trajectories can be unexpected." I can only agree with this statement, as it points to the recurring hypothesis that improving process representation in models will ultimately translate into increased realism and performance. While this may appear axiomatic, in fact issues with equifinality and conceptual uncertainty in hydrology have often challenged this hypothesis. So I was wondering if authors could enrich their section about modeling improvements with some examples of cases when they related model failure to its failure to consider underlying processes, and possibly examples of cases when they succeeded in improving model performance by increasing its realism based on the numerous study plots and datasets they have collected. From a modeling point of view, doing so would add another compelling argument to this paper.

We agree and feel this would strengthen the arguments in the paper about improving model performance through improving process representation. There are numerous clear examples in the published literature to draw from, particularly using the CRHM and MESH models. In our revision, we will include instances where new or improved process representations have led to more successful model simulations, using the CCRN work on various processes as examples.

3. Relatedly, section 4 could be enriched by one paragraph discussing performance of these models for the current climate, given that the following Section 5 discusses future scenarios based on this modeling (is my understanding correct?).

We will include a brief qualitative assessment of the model performance for historical simulations, but will reserve more detailed treatment of this for one or more full papers in due course.

#### SPECIFIC COMMENTS

- line 25 page 2: what do you mean with "freshwater ice cover"?

Here we mean ice cover on lakes and rivers. We will revise to make this clear.

- line 41 page 2: see general comment 1

We will address general comment #1 as noted above. Thank you for the suggestion.

- line 21 page 4: maybe report some statistics here to give an idea of aridity?

Yes, we will do this.

- line 12-13 page 8: I missed an explanation of why in the Arctic earlier AND FASTER melt is predicted.

We are making the point that the CRHM results differ at the Arctic site from those at more southerly locations. There is also an elevation dependency in the results and we will be more clear about this in the revised manuscript.

- Line 26ff page 8: rising temperatures may also alter the way long-wave radiation delays - or accelerates – melt (<https://agupubs.onlinelibrary.wiley.com/doi/full/10.1002/wrcr.20504>). Consider including this in details as you did at line 48 for shrub.

Thank you for this reference. We will review this in detail and determine if it is relevant to our paper. We will certainly include longwave radiation as a component of the energy balance and the impact of its changes under a warming climate as a topic of the discussion.
